# Supplementary material for: Exciton energy transfer and bi-exciton annihilation in the emitting layers of thermally activated delayed fluorescence-based OLEDs
Source: Royal Society of Chemistry journal article supplement (doi:10.1039/d1tc03626b), 2021-01-01
Supplement: d1tc03626b1.pdf [file d1tc03626b1.pdf]

## Electronic Supplementary Information

# Exciton energy transfer and bi-exciton annihilation in the emitting layers of thermally activated delayed fluorescence-based OLEDs

*Hyunchul Kang,<sup>1</sup> Han Jin Ahn,<sup>2</sup> Gyeong Woo Kim,<sup>2</sup> Ji-Eun Jeong,<sup>1</sup> Han Young Woo,<sup>1</sup> Jun-Yun Kim,<sup>2,\*</sup> and Sungnam Park<sup>1,\*</sup>*

<sup>1</sup>Department of Chemistry and Research Institute for Natural Science, Korea University, 145 Anam-ro, Seongbuk-gu, Seoul, 02841, Republic of Korea

<sup>2</sup>LG Display Co. Ltd., LG Science Park, 30, Magokjungang 10-ro, Gangseo-gu, Seoul, 07796, Republic of Korea

Corresponding Authors:

\*E-mail: [windwart@lgdisplay.com](mailto:windwart@lgdisplay.com) (J. Y. Kim) and [spark8@korea.ac.kr](mailto:spark8@korea.ac.kr) (S. Park)

## 1. TADF kinetic model with the concentration quenching of triplet excitons

Time-resolved PL (TRPL) spectra of DPEPO:TDBA-DI films were analyzed by a conventional TADF kinetic model with a concentration quenching of triplet excitons. The coupled differential equations for the concentrations of singlet and triplet excitons ( $[S_1]$  and  $[T_1]$ ) can be written by,

$$\frac{d[S_1](t)}{dt} = -(k_r^S + k_{nr}^S + k_{ISC})[S_1](t) + k_{RISC}[T_1](t) \quad (s1)$$

$$\frac{d[T_1](t)}{dt} = k_{ISC}[S_1](t) - (k_{nr}^T + k_{RISC})[T_1](t) - k_{TTA}[T_1]^2(t) \quad (s2)$$

where  $k_r^S$  is the radiative rate constant of the excited singlet state,  $k_{nr}^S$  is the non-radiative rate constant of the excited singlet state,  $k_{ISC}$  is the intersystem crossing rate constant from the excited singlet state to the excited triplet state,  $k_{RISC}$  is the reverse intersystem crossing rate constant from the excited triplet state to the excited singlet state,  $k_{nr}^T$  is the non-radiative rate constant of the excited triplet state, and  $k_{TTA}$  is the rate constant of the concentration quenching of triplet excitons. The solution of Eqs. (s1) and (s2) is obtained by

$$[S_1](t) = A_{PF} \exp(-t/\tau_{PF}) + A_{DF} \exp(-t/\tau_{DF}) \quad (s3)$$

where  $\tau_{PF} = 1/k_{PF}$  and  $\tau_{DF} = 1/k_{DF}$  were obtained by fitting a multi-exponential function  $I(t) = \sum_{i=1}^n A_i \exp(-t/\tau_i)$  to TRPL signals. The prompt and delayed fluorescence rate constants,  $k_{PF}$  and  $k_{DF}$ , are given by

$$k_{PF} + k_{DF} = k_r^S + k_{nr}^S + k_{ISC} + k_r^T + k_{nr}^T + k_{RISC} + k'_{TTA} \quad (s4)$$

$$k_{PF}k_{DF} = (k_r^S + k_{nr}^S + k_{ISC})(k_r^T + k_{nr}^T + k_{RISC} + k'_{TTA}) - k_{ISC}k_{RISC} \quad (s5)$$

where  $k'_{TTA} = k_{TTA}[T_1]$ . By assuming that  $k_{PF} \gg k_{DF}$ ,  $k_r^S \gg k_{nr}^S, k_{RISC}$ ,  $k_{RISC} \gg k_r^T, k_{nr}^T, k'_{TTA}$ , and  $k_{nr}^S \approx 0, k_{nr}^T \approx 0$  because of high PLQY, the rate constants can be simply obtained as,

$$k_{PF} = 1/\tau_{PF} \approx k_r^S + k_{ISC} \quad (s6)$$

$$k_{DF} = 1/\tau_{DF} \quad (s7)$$

$$k_r^S = k_{PF} \cdot \Phi_{PF} \quad (s8)$$

$$k_{ISC} \approx k_{PF} \cdot (1 - \Phi_{PF}) \quad (s9)$$

$$k_{RISC} = (k_{DF} - k_{nr}^T) / \Phi_{PF} \approx k_{DF} / \Phi_{PF} \quad (s10)$$

On the other hand, when the concentration quenching of triplet excitons occurs and  $k'_{TTA}$  is comparable to  $k_{RISC}$ , Eqs. (s4) and (s5) are reduced to

$$k_{PF} + k_{DF} \approx k_r^S + k_{ISC} + k_{RISC} + k'_{TTA} \quad (s11)$$

$$k_{PF}k_{DF} \approx k_r^S k_{RISC} + k_r^S k'_{TTA} + k_{ISC} k'_{TTA} \quad (s12)$$

Solving Eqs. (s11) and (s12) for  $k'_{TTA}$ ,

$$k'_{TTA} = \frac{1}{2} \left( k_{PF} + k_{DF} - 2k_{RISC} - \sqrt{(k_{PF} - k_{DF})^2 - 4k_{ISC}k_{RISC}} \right) \quad (s13)$$

The rate constant for the concentration quenching of triplet states  $k'_{TTA} = k_{TTA}[T_1]$  can be determined once  $k_{PF}$ ,  $k_{DF}$ ,  $k_{ISC}$ , and  $k_{RISC}$  are experimentally measured.

In our experiments,  $k_{ISC}$  and  $k_{RISC}$  were assumed to be concentration-independent for DPEPO:TDBA-DI films. The  $k_{ISC}$  and  $k_{RISC}$  values obtained from DPEPO:TDBA-DI film (90:10 wt%) were used to determine  $k'_{TTA}$  for DPEPO:TDBA-DI films (70:30 and 50:50 wt%).

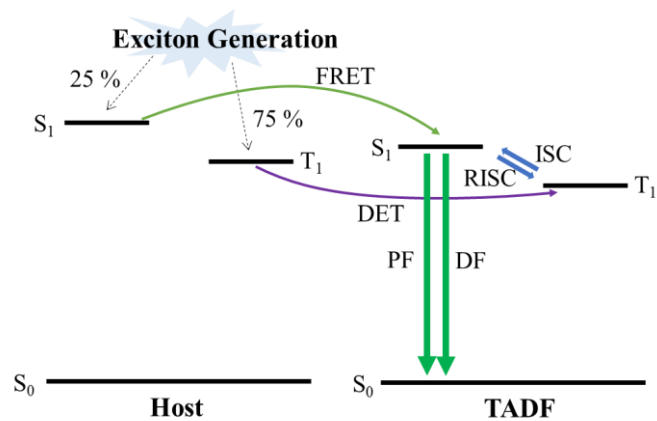

**Figure S1.** Electroluminescence (EL) mechanism of TADF-based OLEDs.

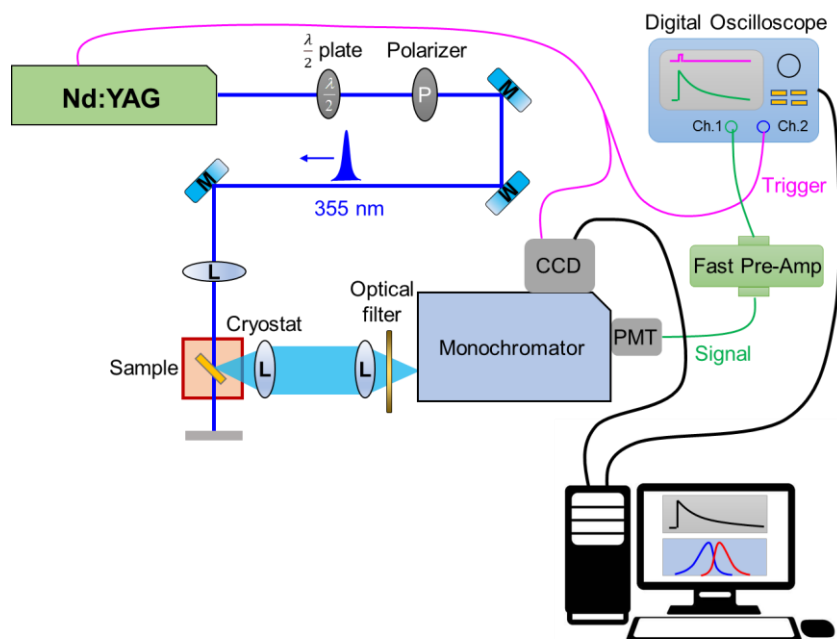

**Figure S2.** Schematic illustration of our TRPL experimental setup.

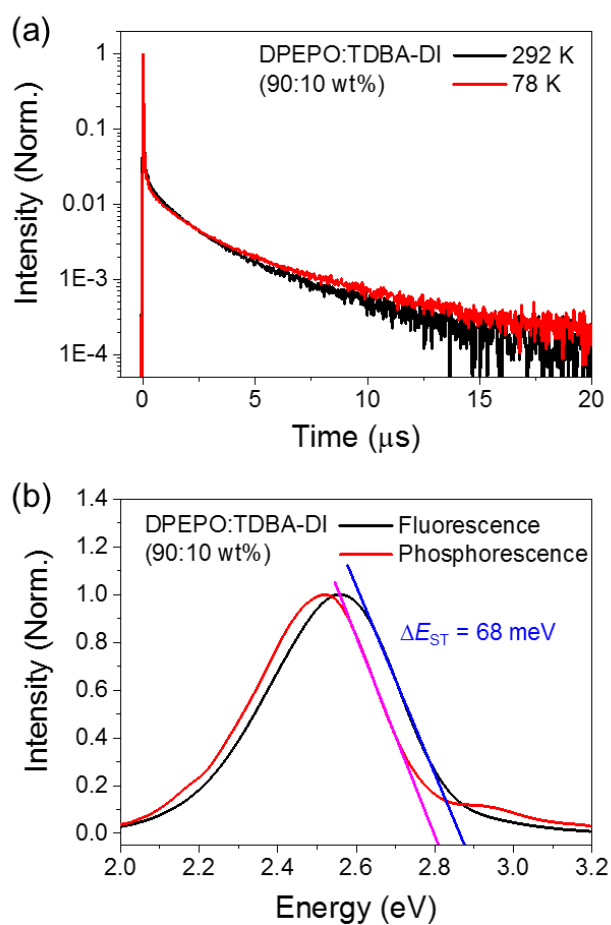

**Figure S3.** (a) TRPL signals of DPEPO:TDBA-DI film (90:10 wt%) measured at 292 K and 78 K. (b) Fluorescence and phosphorescence spectra of DPEPO:TDBA-DI film (90:10 wt%) measured at 78 K ( $\Delta E_{\text{ST}} = 68 \text{ meV}$ ).

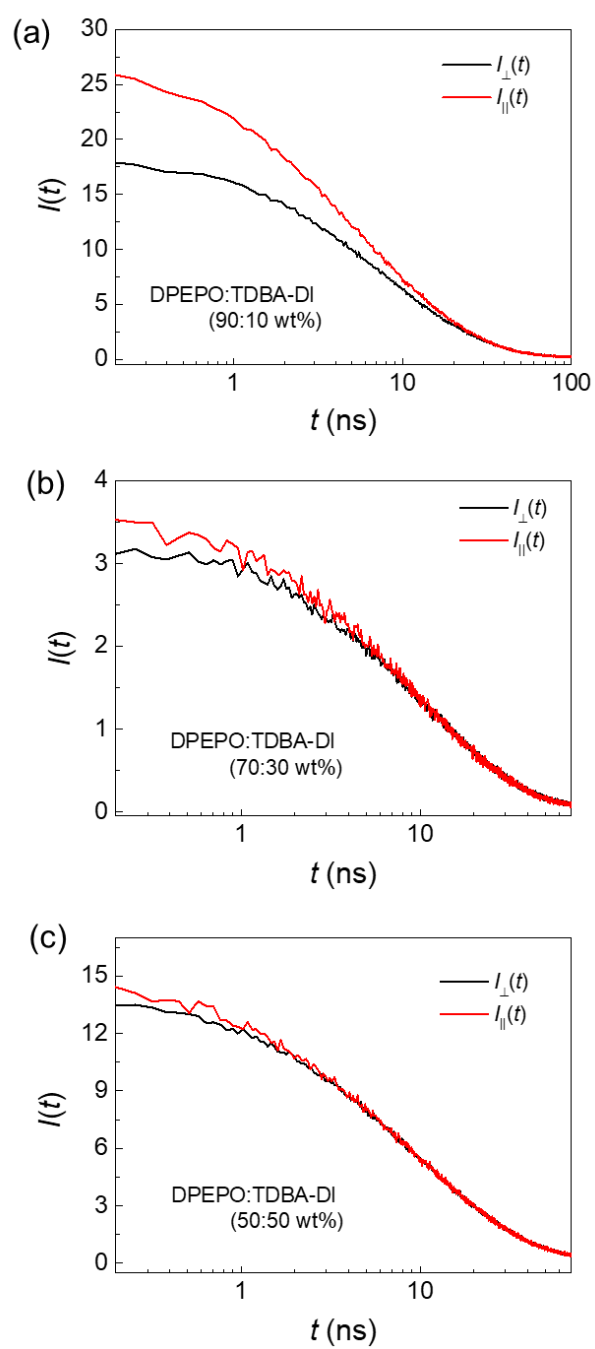

**Figure S4.** Intensity-calibrated  $I_{\parallel}(t)$  and  $I_{\perp}(t)$  measured with DPEPO:TDBA-DI films. (a) 90:10, (b) 70:30, and (c) 50:50 wt%.

**Table S1.** The number of host and dopant molecules ( $n_{\text{host}}$  and  $n_{\text{dopant}}$ ) used for the MD simulations. The volume,  $V_{\text{box}}$ , of the simulation box for DPEPO:TDBA-DI films.

| DPEPO:TDBA-DI (wt%) | $n_{\text{host}}$ | $n_{\text{dopant}}$ | $V_{\text{box}}$ (nm <sup>3</sup> ) |
|---------------------|-------------------|---------------------|-------------------------------------|
| 90 : 10             | 560               | 39                  | 497.8                               |
| 70 : 30             | 467               | 133                 | 565.6                               |
| 50 : 50             | 359               | 240                 | 628.5                               |

**Table S2.** Parameters for the fit of a Gaussian function to the distribution of the minimum distances of all pairs of TDBA-DI molecules in films: mean,  $d_{\text{min,center}}$ , standard deviation,  $w$ , and  $R^2$  values.

| DPEPO:TDBA-DI (wt%) | $d_{\text{min,center}}$ (nm) | $w$ (nm) | $R^2$ |
|---------------------|------------------------------|----------|-------|
| 90 : 10             | 1.30                         | 0.87     | 0.51  |
| 70 : 30             | 0.85                         | 0.58     | 0.87  |
| 50 : 50             | 0.72                         | 0.48     | 0.95  |

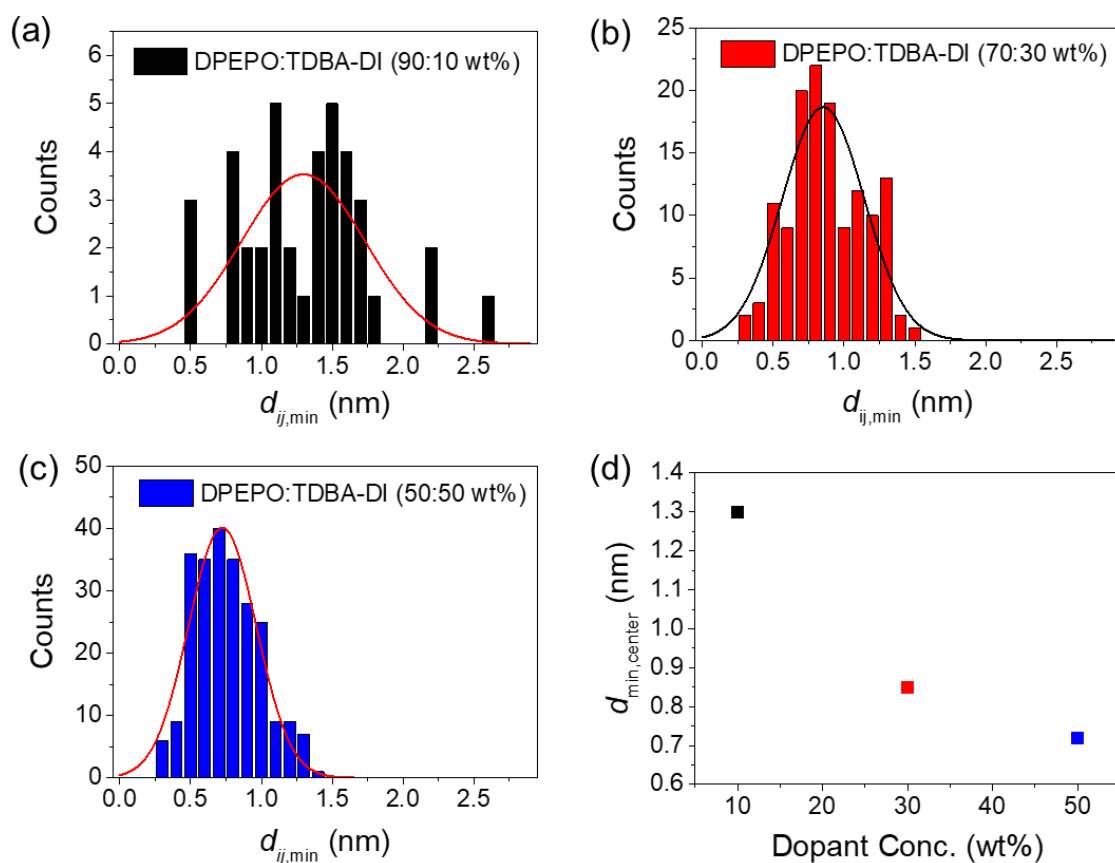

**Figure S5.** Distribution of the minimum distances,  $d_{ij,\min}$ , of all pairs of neighboring TDBA-DI molecules in films: (a) 90:10, (b) 70:30, and (c) 50:50 wt%. The distribution is fitted by a Gaussian function. (d) Comparison of the average minimum distances of neighboring TDBA-DI molecules in films.



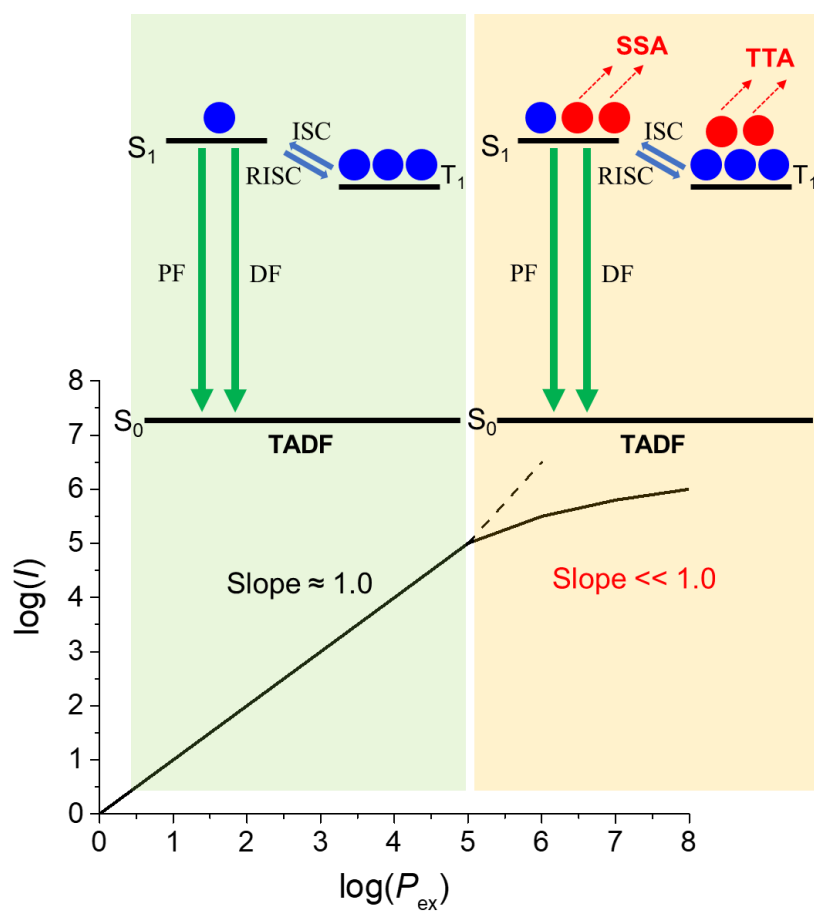

**Figure S6.** Exciton-exciton annihilation mechanism (bi-exciton recombination) in TADF-based OLEDs when the excitation laser power is increased.

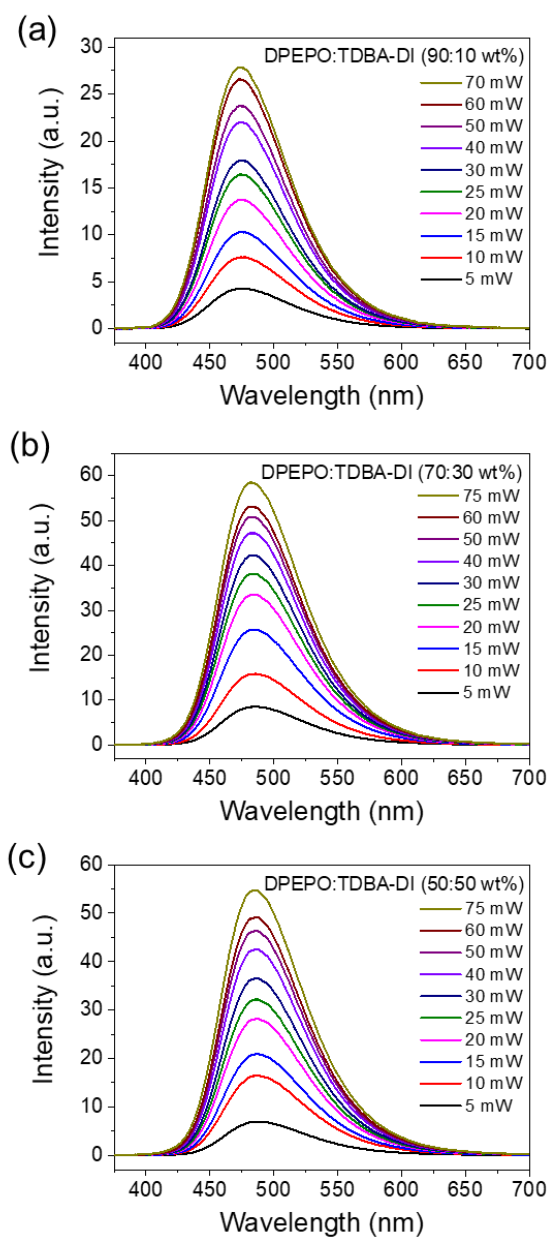

**Figure S7.** Excitation power-dependent PL spectra of DPEPO:TDBA-DI films. (a) 90:10, (b) 70:30, and (c) 50:50 wt%.

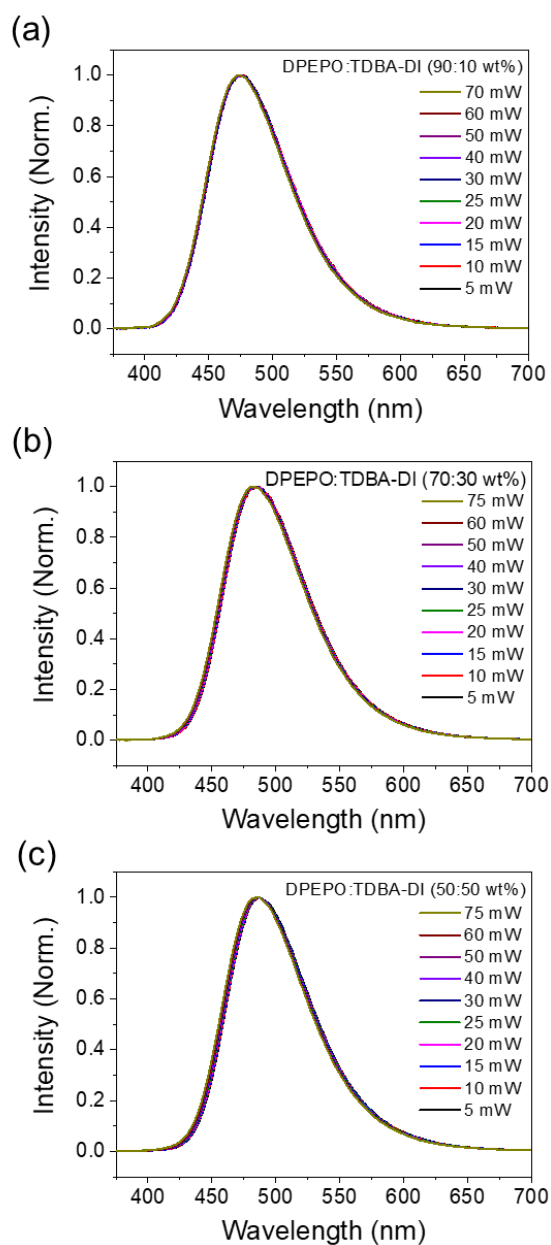

**Figure S8.** Normalized excitation power-dependent PL spectra of DPEPO:TDBA-DI films. (a) 90:10, (b) 70:30, and (c) 50:50 wt%.
